# Supplementary material
Source: MDPI journal article supplement (https://www.mdpi.com/2227-9717/9/7/1169)
Supplement: s1 [file s1]

## Supplementary Information

### Mass Transfer Kinetics and Liquid-Liquid Equilibrium of DES-Aromatic-Aliphatic Ternary Systems With Accurate COSMO Model Predictions

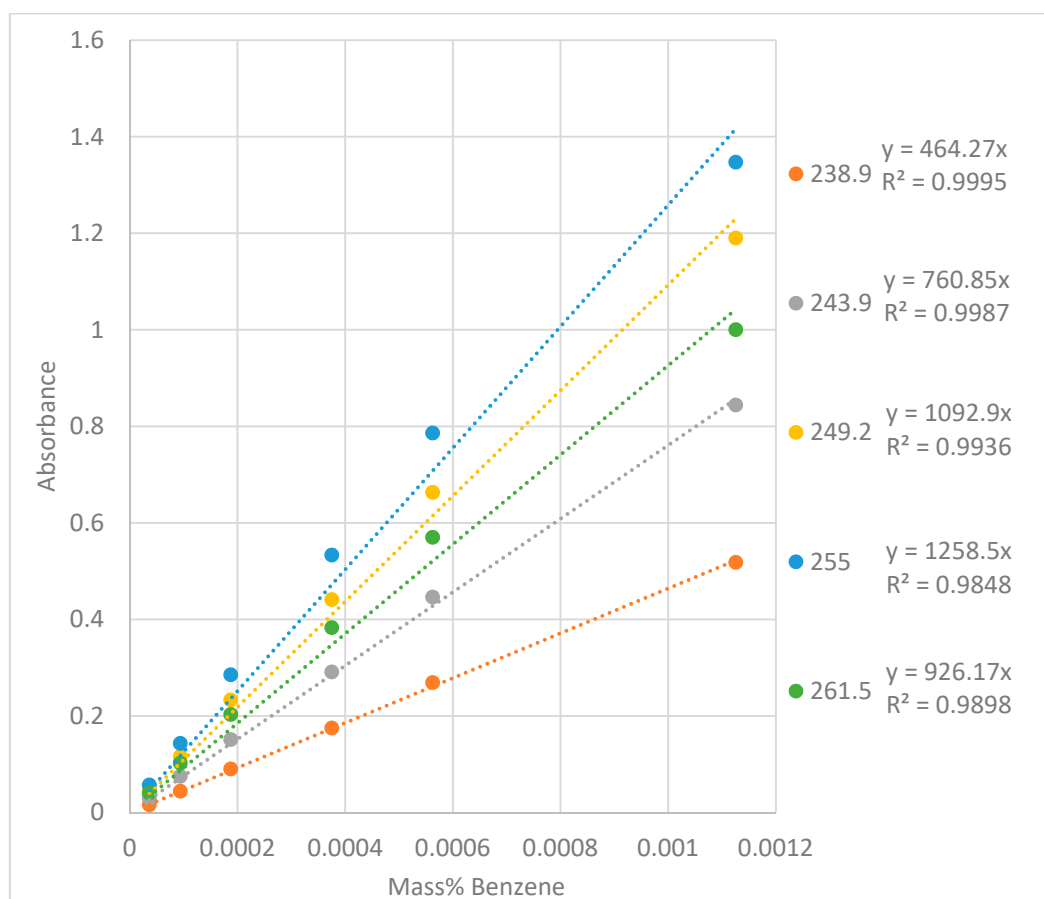

Figure S1. Beer-Lambert Relation for Benzene in Cyclohexane at Notable Absorbance Peaks

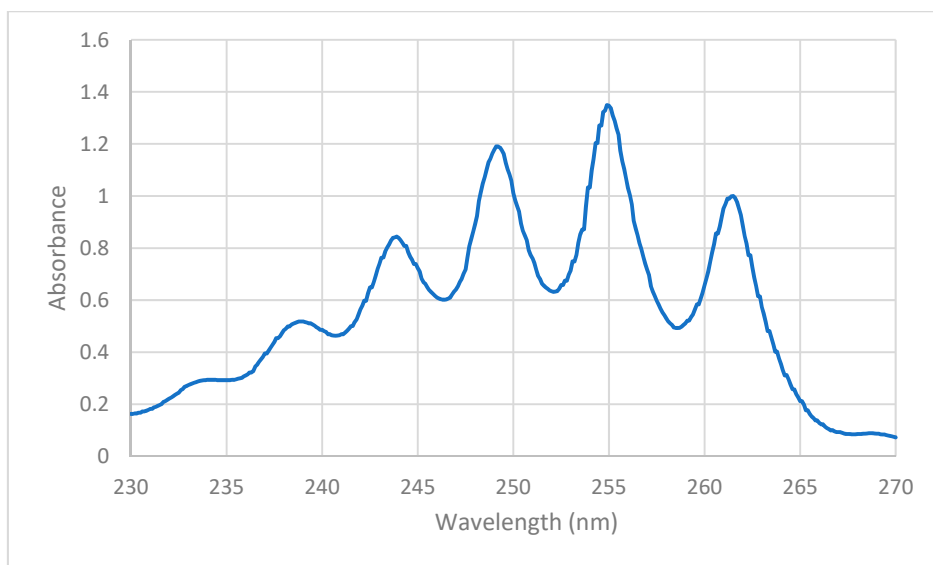

Figure S2. UV-Vis Spectra for Benzene in Cyclohexane

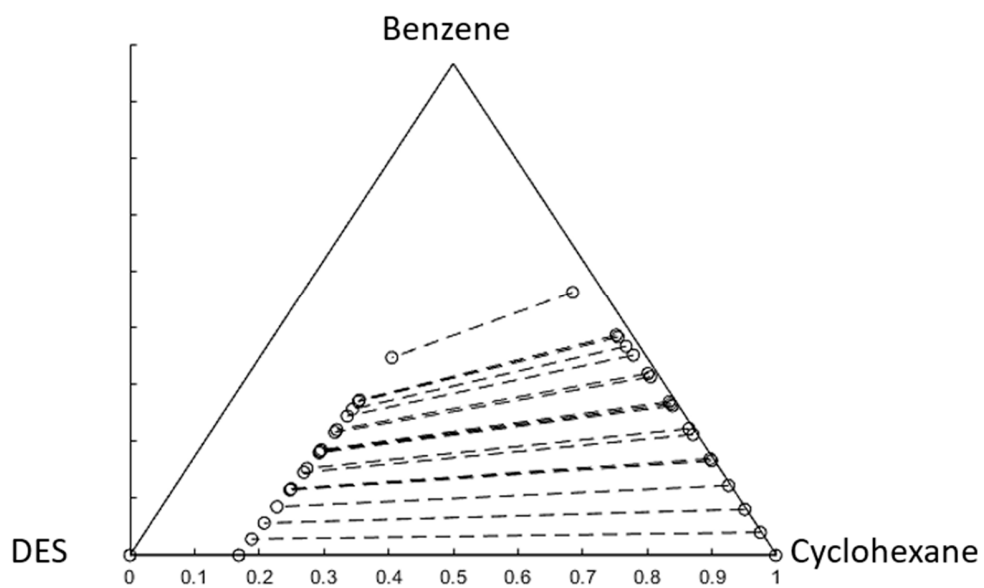

Figure S3. Predicted LLE of  $N_{666}Br:EG$  (1:2), Cyclohexane and Benzene at 25°C. Concentrations in Mass Fraction

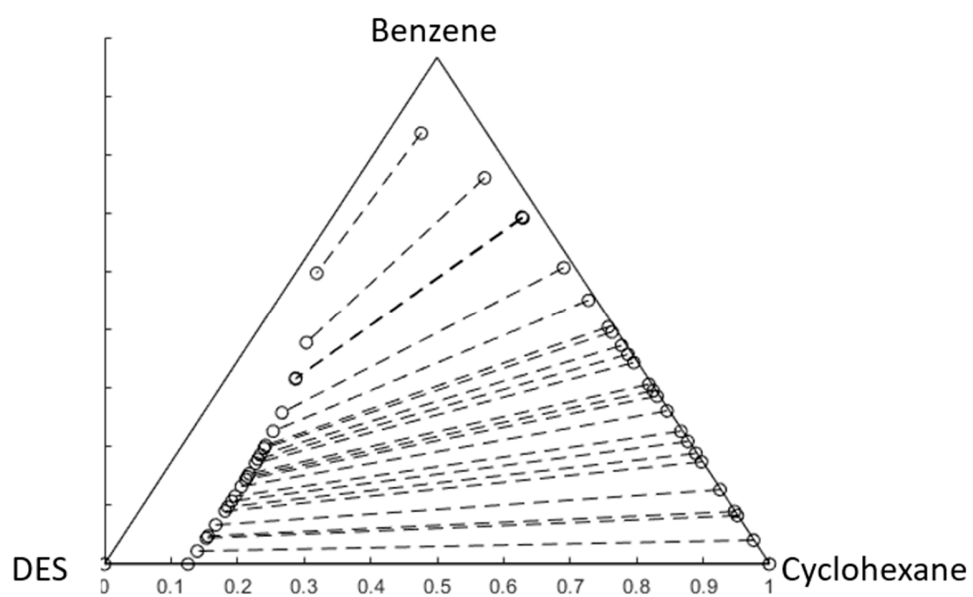

Figure S4. Predicted LLE of  $N_{666}Br:Gly$  (1:2), Cyclohexane and Benzene at 25°C. Concentrations in Mass Fraction

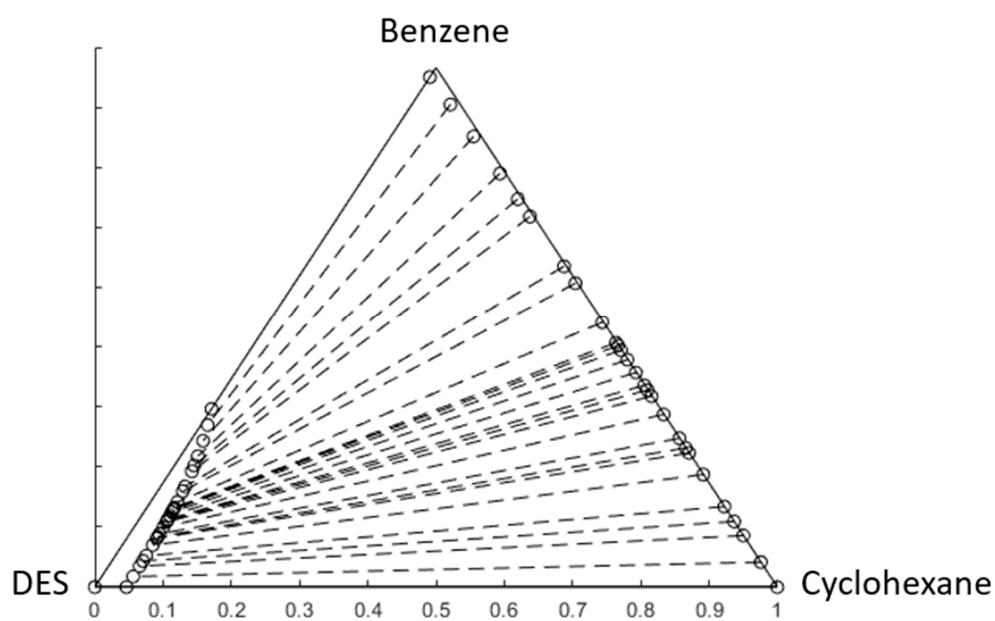

Figure S5. Predicted LLE of METPB:EG (1:3), Cyclohexane and Benzene at 25°C. Concentrations in Mass Fraction

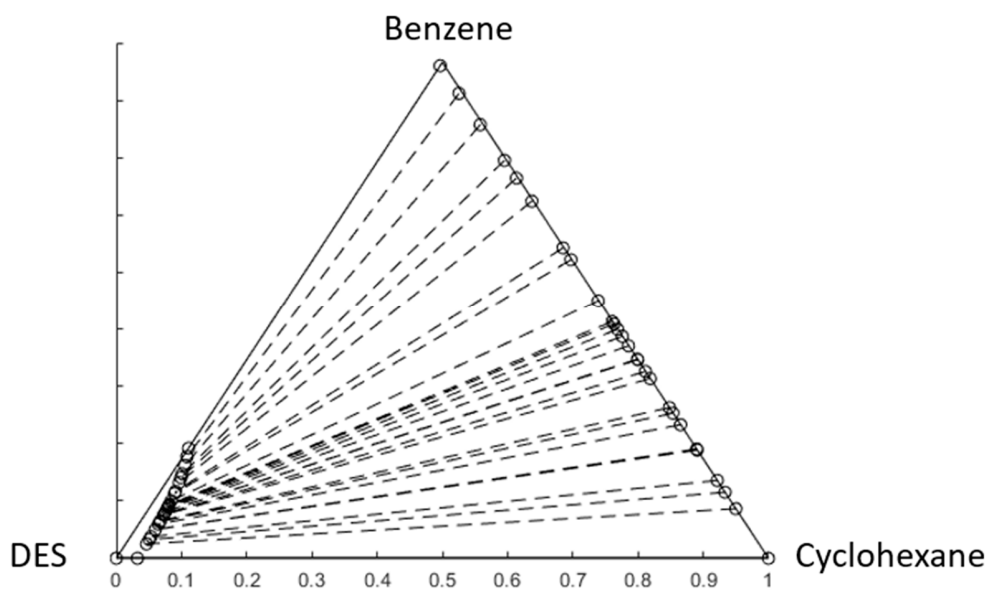

Figure S6. Predicted LLE of METPB:Gly (1:3), Cyclohexane and Benzene at 25°C. Concentrations in Mass Fraction

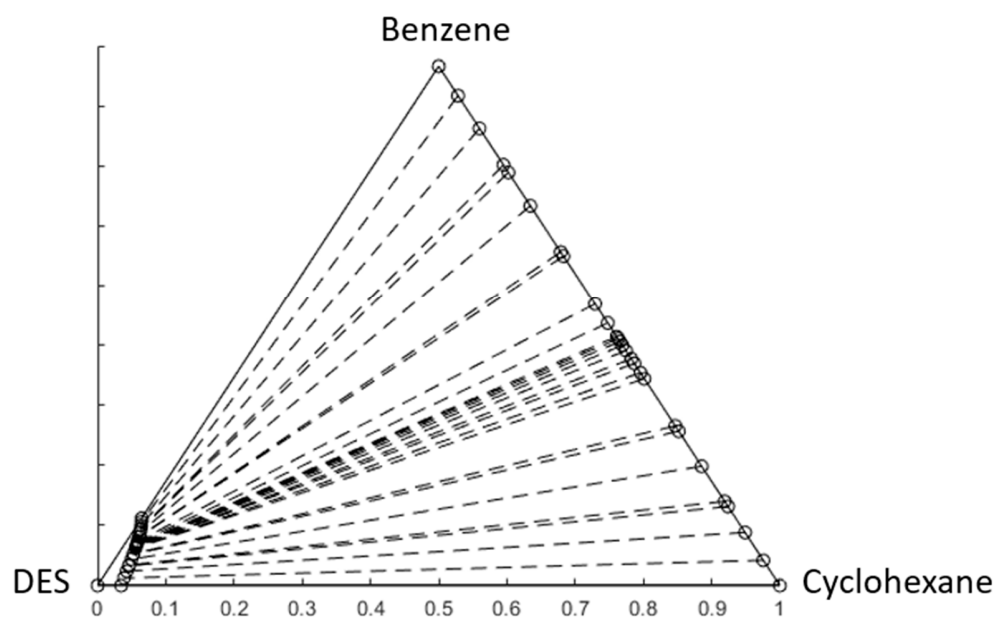

Figure S7. Predicted LLE of ChCl:EG (1:2), Cyclohexane and Benzene at 25°C. Concentrations in Mass Fraction

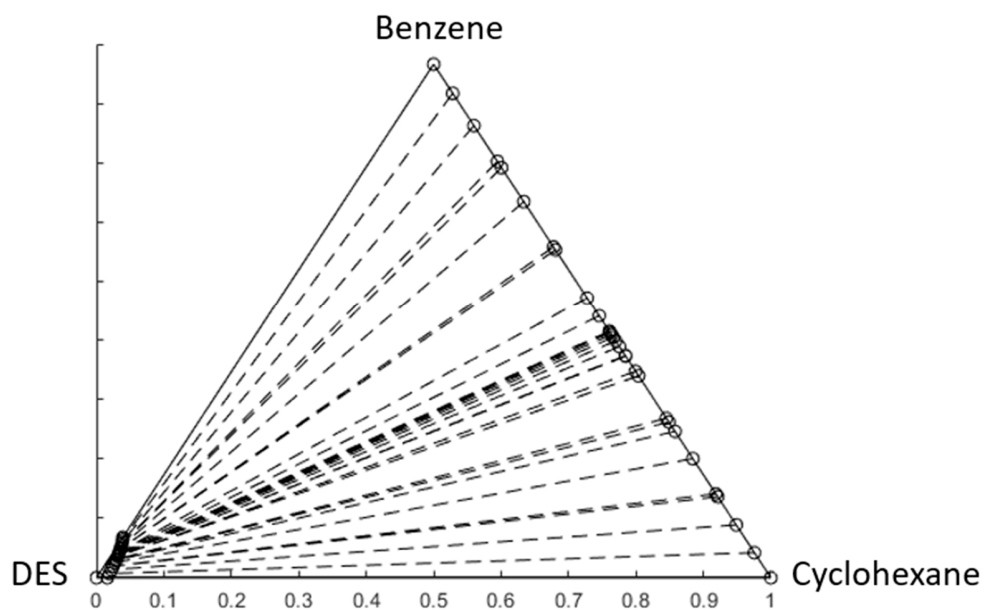

Figure S8. Predicted LLE of ChCl:Gly (1:2), Cyclohexane and Benzene at 25°C. Concentrations in Mass Fraction

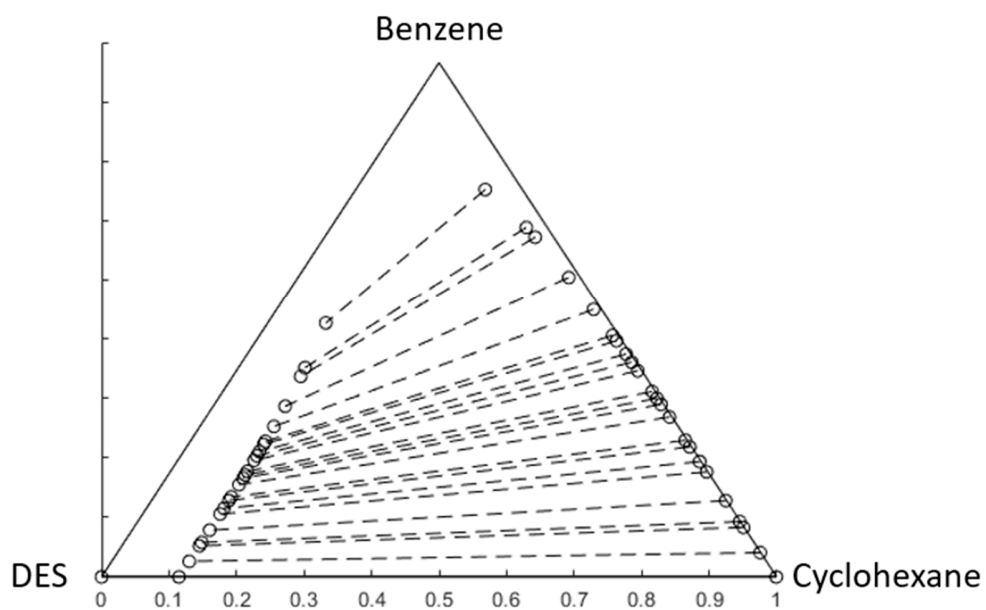

Figure S9. Predicted LLE of N<sub>4444</sub>Br:EG (1:2), Cyclohexane and Benzene at 25°C. Concentrations in Mass Fraction

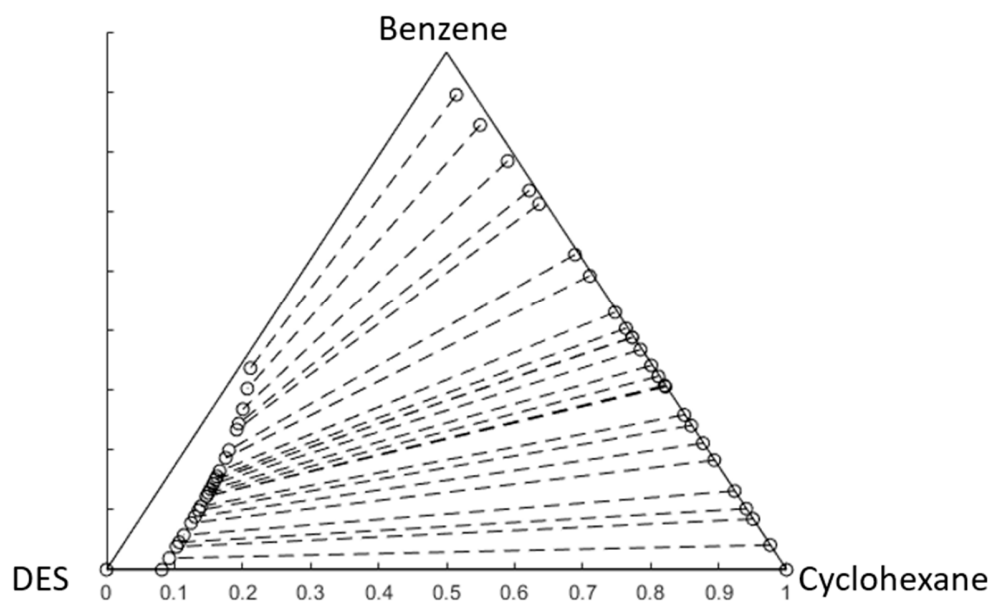

*Figure S10. Predicted LLE of  $N_{444}Br:Gly$  (1:2), Cyclohexane and Benzene at 25°C. Concentrations in Mass Fraction*
